# Supplementary material for: Fabrication of an All-Solid-State Ammonium Paper Electrode Using a Graphite-Polyvinyl Butyral Transducer Layer
Source: MDPI journal article supplement (doi:10.3390/chemosensors9120333), 2021-11-26
Supplement: s1 [file s1]

Supplementary data

# Fabrication of An All-Solid-State Ammonium Paper Electrode Using A Graphite-Polyvinyl Butyral Transducer Layer

Irena Ivanišević \*, Stjepan Milardović †, Antonia Ressler and Petar Kassal \*

Faculty of Chemical Engineering and Technology, University of Zagreb, Marulićev trg 19, 10000 Zagreb, Croatia; [smilard@fkit.hr](mailto:smilard@fkit.hr) (S.M.); [aressler@fkit.hr](mailto:aressler@fkit.hr) (A.R.)

\* Correspondence: [ivanisevic@fkit.hr](mailto:ivanisevic@fkit.hr) (I.I.), [pkassal@fkit.hr](mailto:pkassal@fkit.hr) (P.K.)

† This author passed away before submission of this manuscript.

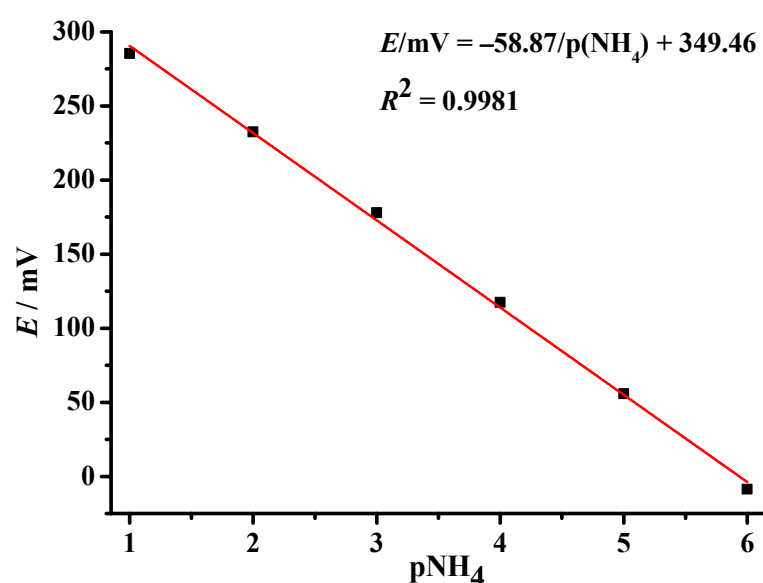

**Figure S1.** Calibration curve of the conventional ammonium ion-selective electrode immersed in  $10^{-6}$  –  $10^{-1}$  M  $\text{NH}_4\text{Cl}$  solutions.

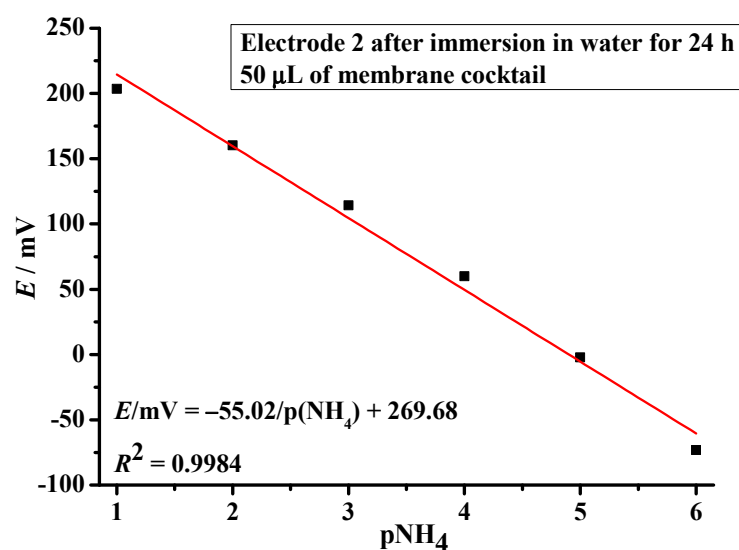

**Figure S2.** Calibration curve of the graphite disc electrode coated with 50 µL of ammonium membrane mixture. Measurements were performed in  $10^{-6}$  –  $10^{-1}$  M  $\text{NH}_4\text{Cl}$  solutions after immersion of the prepared sensor in water for 24 h.

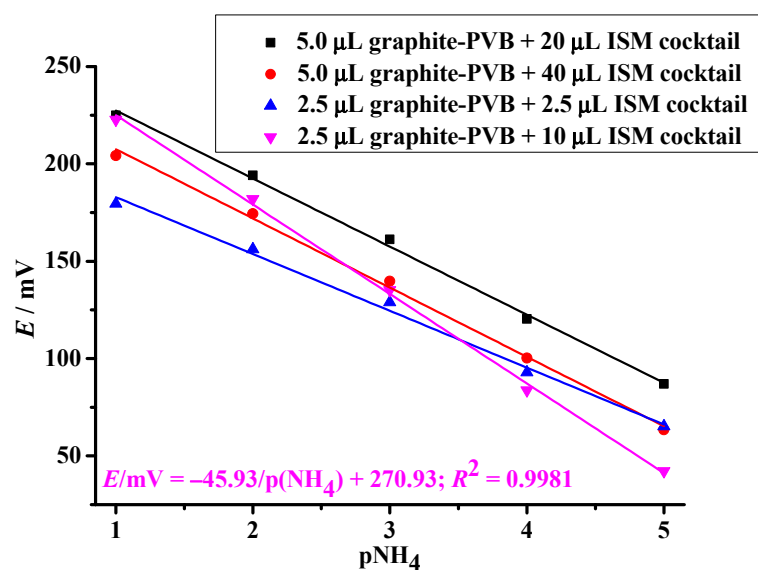

**Figure S3.** Optimization of the sensor parameters. Linear range of ammonium-selective ISE prepared with various amounts of graphite-PVB (50 wt %) transducer formulation layered over a graphite disc electrode and different volumes of membrane mixture. The measurements were performed in the same solutions as in the previous Figure.

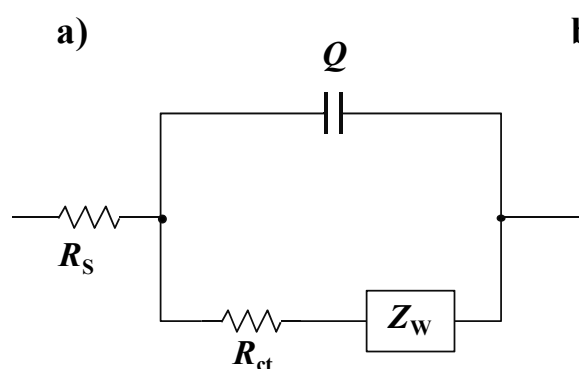

b)

| graphite(65 wt %)-PVB/graphite electrode        |                       |
|-------------------------------------------------|-----------------------|
| $R_s (\Omega \cdot \text{cm}^2)$                | 223                   |
| $R_{ct} (\Omega \cdot \text{cm}^2)$             | 7805                  |
| $Z_w (\text{S} \cdot \text{s}^n / \text{cm}^2)$ | $1.36 \times 10^{-3}$ |
| $Q (\text{S} \cdot \text{s}^5 / \text{cm}^2)$   | $6.06 \times 10^{-5}$ |
| Chi squared ( $\chi^2$ )                        | $1.47 \times 10^{-3}$ |

**Figure S4.** R(Q(RW)) circuit for simulation of impedance spectra (a) and results of circuit modeling (b) of graphite(65 wt %)-PVB coated graphite electrode using ZSimpWin simulation programme.  $R_s$  – solution resistance,  $R_{ct}$  – charge transfer resistance,  $Z_w$  – Warburg impedance,  $Q$  – constant phase element.
