# Supplementary material for: Fabrication of an All-Solid-State Ammonium Paper Electrode Using a Graphite-Polyvinyl Butyral Transducer Layer
Source: MDPI journal article supplement (doi:10.3390/chemosensors9120333), 2021-11-26
Supplement: s1 [file s1]

Archive with 1 entries (1 files):
- chemosensors-1463050-supplementry.pdf
